# Supplementary material for: Acetotrophic methanogens are sensitive to long-term nickel contamination in paddy soil
Source: Royal Society of Chemistry journal article supplement (doi:10.1039/d0em00029a), 2020-01-01
Supplement: d0em00029a1.pdf [file d0em00029a1.pdf]

**Article title:** Acetotrophic methanogens are sensitive to long-term nickel contaminated in paddy soil

Author names: Chen Xueping<sup>1,2</sup>, Yu Juan<sup>1</sup>, Chen Zheng<sup>3</sup>, Zhang Hongmei<sup>4</sup>, Cheng Wangda<sup>4</sup>, Bai Fayan<sup>1</sup>, Zheng Yu<sup>1</sup>,  
Khan Imran, He Chiquan<sup>1</sup>, Liu Xiaoyan<sup>1</sup>

**Corresponding author:**

XuePing Chen

E-mail: xpchen@shu.edu.cn

Address: 150#, 99 Shangda Road, Shanghai, 200444, China

Tel: +86 021 66137746

Fax: +86 021 66137756

Zheng Chen

E-mail: zheng.chen@xjtlu.edu.cn

Address: Renai Rd, 111 Suzhou Ind Pk, Suzhou 215123, China

Tel. / Fax: +86 0512 81880471

| Treatment | pH         | water content (%) | SOC (g kg <sup>-1</sup> ) | MBC (mg kg <sup>-1</sup> ) | DOC (mg kg <sup>-1</sup> ) | TN (g kg <sup>-1</sup> ) | NH <sub>4</sub> <sup>+</sup> (mg kg <sup>-1</sup> ) | NO <sub>3</sub> <sup>-</sup> (mg kg <sup>-1</sup> ) | SO <sub>4</sub> <sup>2-</sup> (g kg <sup>-1</sup> ) | Fe <sup>3+</sup> (g kg <sup>-1</sup> ) | Fe <sup>2+</sup> (g kg <sup>-1</sup> ) | NO <sub>2</sub> <sup>-</sup> (mg kg <sup>-1</sup> ) |
|-----------|------------|-------------------|---------------------------|----------------------------|----------------------------|--------------------------|-----------------------------------------------------|-----------------------------------------------------|-----------------------------------------------------|----------------------------------------|----------------------------------------|-----------------------------------------------------|
| Ni0       | 6.21±0.12a | 30.2±0.11a        | 23.6±0.52a                | 48.1±1.90a                 | 139.6±0.53a                | 4.19±0.24b               | 135.2±1.12a                                         | 13.1±0.52b                                          | 0.421±0.01b                                         | 4.62±0.91bc                            | 0.123±0.02b                            | 0.846±0.41a                                         |
| Ni50      | 6.32±0.21a | 30.5±0.13a        | 21.6±0.54ab               | 47.6±2.17a                 | 134.0±1.61a                | 3.98±0.21bc              | 111.7±1.90b                                         | 12.9±1.10b                                          | 0.730±0.02a                                         | 4.51±0.89bc                            | 1.310±0.40a                            | 0.613±0.22a                                         |
| Ni200     | 6.71±0.10a | 30.7±0.16a        | 17.0±1.33b                | 21.0±1.21b                 | 88.2±1.07b                 | 2.58±0.11d               | 113.2±2.23b                                         | 10.9±0.44bc                                         | 0.420±0.13b                                         | 11.3±0.22a                             | 0.419±0.31b                            | 0.412±0.03a                                         |
| Ni500     | 6.13±0.14a | 26.3±0.09b        | 23.3±0.01a                | 23.3±0.01a                 | 89.2±1.50b                 | 4.69±0.31a               | 83.1±1.71c                                          | 19.5±0.61a                                          | 0.432±0.05b                                         | 5.84±0.31b                             | 0.206±0.03b                            | 0.402±0.12a                                         |

c

**Table S1** Physicochemical properties in long-term Ni-polluted paddy soils with different amounts of Ni amendments.

|                         | Total Nickel | Available Nickel | Methane production rate |
|-------------------------|--------------|------------------|-------------------------|
| Total Nickel            | 1            | 0.993            | -0.884                  |
| Available Nickel        |              | 1                | -0.930                  |
| Methane production rate |              |                  | 1                       |

**Table S2** Correlation analysis of Pearson coefficient between Ni and CH<sub>4</sub> production process

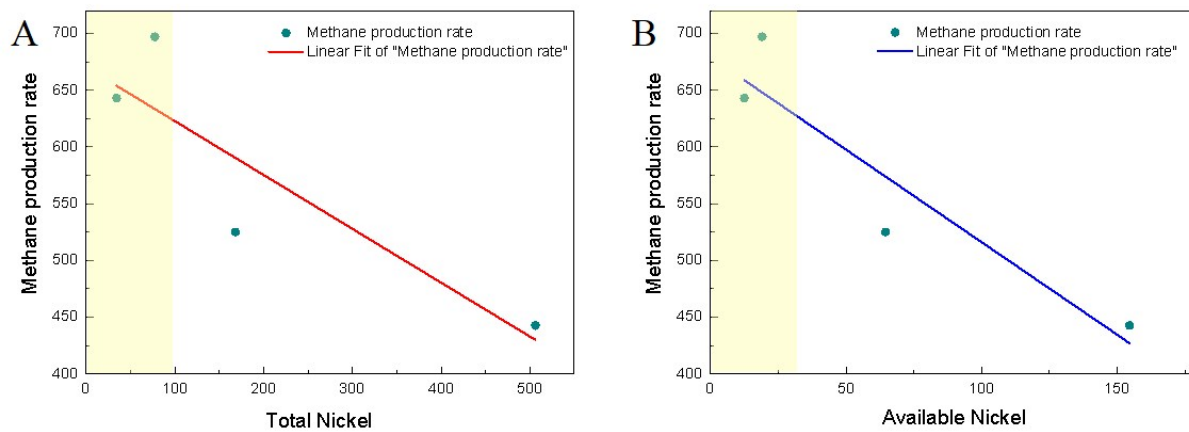

**Fig. S1** Linear fit between CH<sub>4</sub> production rate and Total Nickel (A), Available Nickel (B).
